# Supplementary material for: The polyketide synthase PKS15 has a crucial role in cell wall formation in Beauveria bassiana
Source: PubMed Central journal article supplement (PMC7387532; doi:10.1038/s41598-020-69417-w), 2020-07-28
Supplement: 41598_2020_69417_MOESM1_ESM.pdf [file 41598_2020_69417_MOESM1_ESM.pdf]

## Supplementary Information

### **The polyketide synthase PKS15 has a crucial role in cell wall formation in *Beauveria bassiana***

Somsiri Udompaisarn<sup>1</sup>, Wachiraporn Toopaang<sup>1</sup>, Udom Sae-Ueng<sup>1</sup>,  
Chettida Srisuksam<sup>1</sup>, Nuchnudda Wichienchote<sup>1</sup>, Rudsamee Wasuwan<sup>1</sup>, Nur Amalina Shamsun  
Nahar<sup>3</sup>, Morakot Tanticharoen<sup>2</sup> and Alongkorn Amnuaykanjanasin<sup>1,\*</sup>

<sup>1</sup> National Center for Genetic Engineering and Biotechnology (BIOTEC), National Science and  
Technology Development Agency (NSTDA), 113 Thailand Science Park, Paholyothin Rd.,  
Tambon Khlong Nueng, Amphoe Khlong Luang, Pathum Thani 12120, Thailand

<sup>2</sup> School of Bioresources and Technology, King Mongkut's University of Technology Thonburi,  
Bangkok 10140, Thailand

<sup>3</sup> Temasek Polytechnic, 21 Tampines Avenue 1, Singapore 529757, Singapore

\* Correspondence: [alongkorn@biotec.or.th](mailto:alongkorn@biotec.or.th)

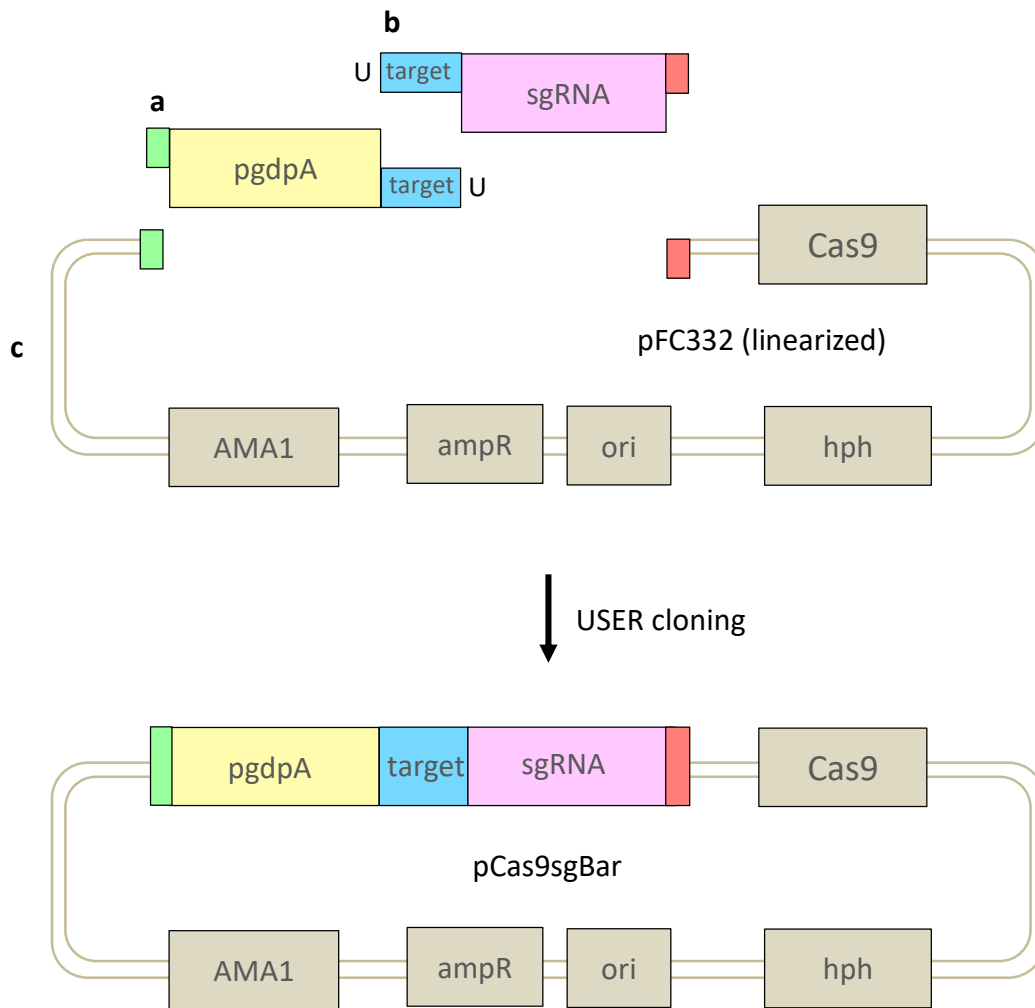

**Supplemental Figure S1.** Schematic representation of the pCas9sgBar plasmid construction. Detailed cloning protocols are described previously (Nodvig et al., 2015). Briefly, the guide RNA is assembled by a fusion of two fragments in order to introduce “our gene-specific guide RNA (sgRNA) sequence” in the vector. The gene-specific guide RNA sequence is incorporated in the primers used for the vector construction. The vector pFC334 was used as the template to amplify (a) pgdpA tRNA promoter element and (b) sgRNA expression cassette. Each PCR fragment was amplified by primers containing 25 nucleotides overhang (=target) and followed by a uracil base (U). Uracil DNA glycosylase and DNA glycosylase-lyase Endonuclease VIII (USER Enzyme) was used for elimination of the uracil bases in the PCR fragments. This enzyme digestion generated complementary overhangs at the ends of all three fragments, which facilitated the fusion of the two PCR fragments and the linearized vector pFC332 by USER cloning in one step. (c) The vector backbone for construction of pCas9sgBar is derived from the pFC332. Sticky ends for USER cloning are achieved by restriction digestion of PacI (green) and Nt.BbvCI (red) sites in pFC332. It is noted that AMA1 is a plasmid replicator, originally reported in *Aspergillus nidulans* (Aleksenko and Clutterbuck, 1997) and recently used in Nodvig et al. (2015). In principle, an AMA1-containing plasmid could be easily lost when there is no selection. However, the autonomous replication of such plasmid remain to be proven in each fungus tested.

**Supplemental Figure S2.** Sequence alignment of the *pks15* locus of *B. bassiana* wild type (Query) and that of the complemented isolate G6 (Sbjct)

```

Query 1      ATGCTCATCGACAAAATGGAGACGCCACACCTCTTGCCATTGTCGGCATGGCCTGCCGC 60
           ||||||||||||||||||||||||||||||||||||||||||||||||||||||||
Sbjct 1      ATGCTCATCGACAAAATGGAGACGCCACACCTCTTGCCATTGTCGGCATGGCCTGCCGC 60

Query 61     ACGTCCGGTGATGTGAGGACAATCGATGAGTTTGGACTATGCTGTCTCGGTCCCGACAC 120
           ||||||||||||||||||||||||||||||||||||||||||||||||||||||||
Sbjct 61     ACGTCCGGTGATGTGAGGACAATCGATGAGTTTGGACTATGCTGTCTCGGTCCCGACAC 120

Query 121    GGTTCGGCCCTATTCCCAAGAGTCGATACAATGCCGAGGCTTACTACCACCCGAATCCG 180
           ||||||||||||||||||||||||||||||||||||||||||||||||||||||||
Sbjct 121    GGTTCGGCCCTATTCCCAAGAGTCGATACAATGCCGAGGCTTACTACCACCCGAATCCG 180

Query 181    CAAAAGAGAGGCACCTTCAACCAAGTTGGTGGCTACTTCATCGATAGAGATTCTCCGTC 240
           ||||||||||||||||||||||||||||||||||||||||||||||||||||||||
Sbjct 181    CAAAAGAGAGGCACCTTCAACCAAGTTGGTGGCTACTTCATCGATAGAGATTCTCCGTC 240

Query 241    TTTGACGCGCCTTCTTCAACATTACCAAACAAGAAGCCAGTCAATGGGTAAGTACTGC 300
           ||||||||||||||||||||||||||||||||||||||||||||||||||||||||
Sbjct 241    TTTGACGCGCCTTCTTCAACATTACCAAACAAGAAGCCAGTCAATGGGTAAGTACTGC 300

Query 301    CAGATATTCATATGGCCACTTCGCCGGTGCTAATGCGCCTCGTCAGACATCAACCAGAGA 360
           ||||||||||||||||||||||||||||||||||||||||||||||||||||||||
Sbjct 301    CAGATATTCATATGGCCACTTCGCCGGTGCTAATGCGCCTCGTCAGACATCAACCAGAGA 360

Query 361    CAACTTCTCGAATGCACATACGAAGCCCTGGAAAATGCTGGTCTACCCAAGGGTAAGATC 420
           ||||||||||||||||||||||||||||||||||||||||||||||||||||||||
Sbjct 361    CAACTTCTCGAATGCACATACGAAGCCCTGGAAAATGCTGGTCTACCCAAGGGTAAGATC 420

Query 421    TCCGGCGAAAAGATGGGTGTCTTCATTGGAACGAAACGAGCCGACTATCGTACCGGAAGC 480
           ||||||||||||||||||||||||||||||||||||||||||||||||||||||||
Sbjct 421    TCCGGCGAAAAGATGGGTGTCTTCATTGGAACGAAACGAGCCGACTATCGTACCGGAAGC 480

Query 481    TTGCAGGACCTCAACCAAGTCGAAATGTTGGAAGCTACCAGTGGCCACAGCTCCATTTCAG 540
           ||||||||||||||||||||||||||||||||||||||||||||||||||||||||
Sbjct 481    TTGCAGGACCTCAACCAAGTCGAAATGTTGGAAGCTACCAGTGGCCACAGCTCCATTTCAG 540

```



Sbjct 1081 ACTAAGCGTTCGCCTCTATACCTTGGCTCAGTGAAGACCAACATCGGCCATCTGGAGAAT 1140

Query 1141 GCCAGTGGTTTGCTCTCCGTCATCAAGTCTACTCTCATGC 1180

|||||

Sbjct 1141 GCCAGTGGTTTGCTCTCCGTCATCAAGTCTACTCTCATGC 1180

## Segmentation of conidia

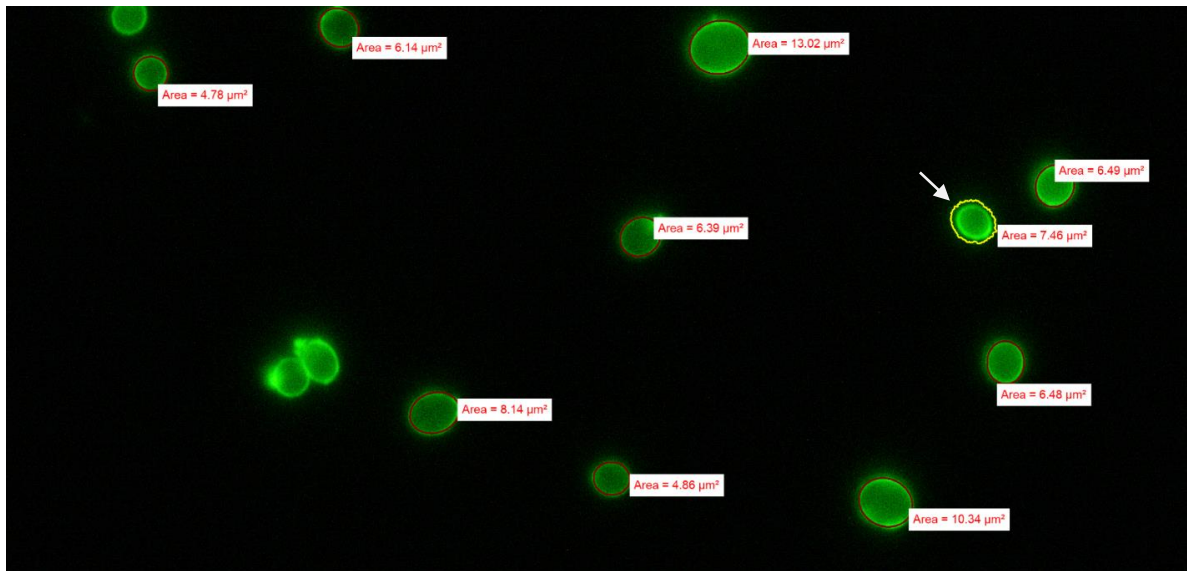

## Segmentation of blastospores

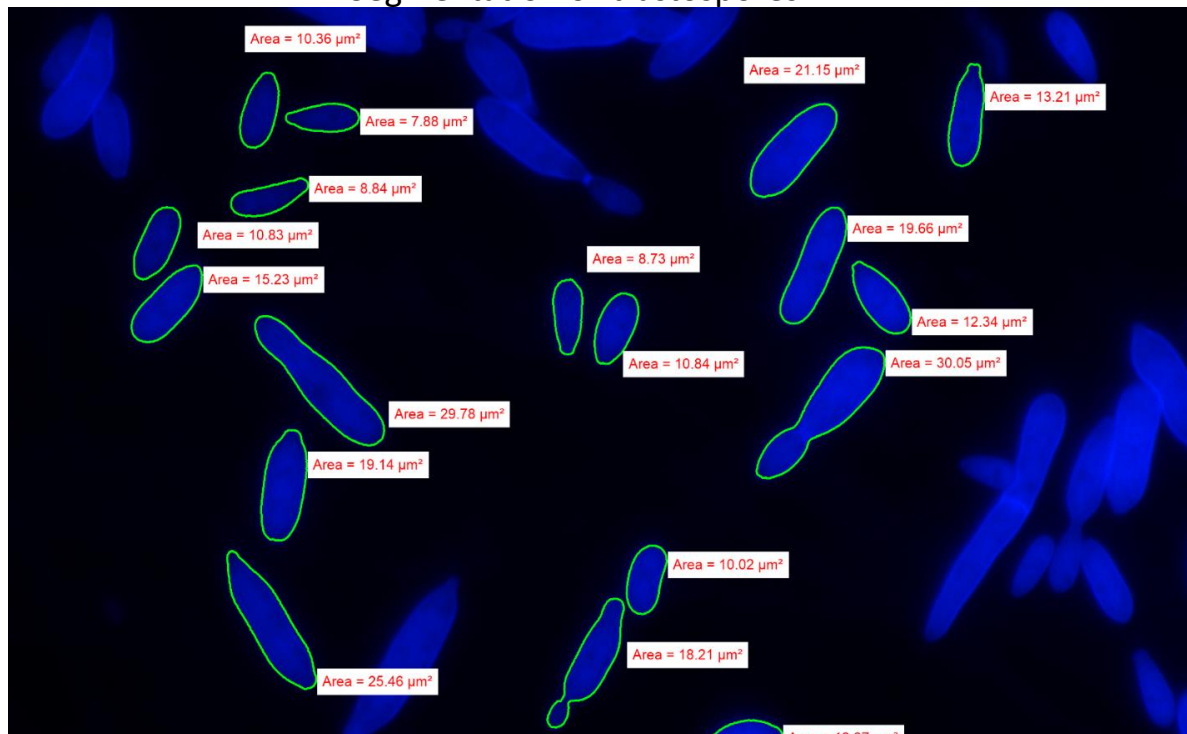

**Supplemental Figure S3. Determination of spore size and shape in 2D images.** **A.** Segmentation of conidia, stained by FITC-tagged concanavalin A. The '5 Point Ellipse' feature in the area measurement of the NIS-Elements was manually used to mark the boundary of a conidium. **B.** Segmentation of blastospores, stained by calcofluor white. The 'Auto Detect' feature was used to indicate the boundary of a blastospore. Then, 'size' was automatically determined as 'area' by the software. The budding blastospores were excluded in the analysis. It is noted that if the 'Auto Detect' feature was used to mark the boundary of a conidium (indicated by an arrow), the segmentation was not accurate due to the fluorescence appearing outside the conidium.
